# Supplementary material
Source: Springer Nature journal article supplement (https://www.springermedizin.de/resource/supplementary/12885_2013_4456_MOESM6_ESM.pdf/9466468)

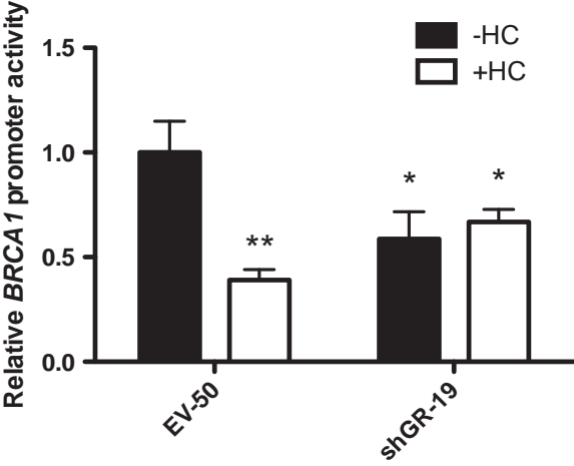

Relative *BRCA1* promoter activity

1.5

1.0

0.5

0.0

EV-50

shGR-19

■ -HC  
□ +HC

\*\*

\*

\*

Supplement: MOESM6 [file 9466468]
